# Supplementary material for: Tubular Secretion and Estimated GFR Decline in the Jackson Heart Study
Source: PubMed Central journal article supplement — Kidney Int Rep. 2022 Sep 12;7(12):2668–75. doi: 10.1016/j.ekir.2022.09.008 (PMC9727527; doi:10.1016/j.ekir.2022.09.008), 2022-09-12
Supplement: mmc1.pdf [file mmc1.pdf]

**Supplemental Table 1. Associations of secretory solute clearance with eGFR decline after truncating extreme solute clearance values.<sup>a</sup>**

|                   | Median (IQR) clearance |                     | Model 1           |          | Model 2           |          |
|-------------------|------------------------|---------------------|-------------------|----------|-------------------|----------|
|                   | Controls               | Cases               | OR (95% CI)       | p-value  | OR (95% CI)       | p-value  |
| Cinnamoylglycine  | 151.8 (94.9-309.0)     | 170.7 (95.5-289.2)  | 0.89 (0.72, 1.10) | 0.28     | 0.88 (0.70, 1.10) | 0.25     |
| Isovalerylglycine | 715.8 (521.5-1221.0)   | 632.5 (445.0-997.3) | 1.69 (1.14, 2.52) | 0.0097** | 1.91 (1.23, 2.96) | 0.004**  |
| Kynurenic acid    | 403.4 (273.7-588.3)    | 324.3 (243.1-456.9) | 1.93 (1.18, 3.16) | 0.0086** | 2.26 (1.33, 3.87) | 0.0028** |
| P-cresol sulfate  | 34.9 (24.4-51.6)       | 30.7 (20.5-48.0)    | 1.14 (0.88, 1.48) | 0.33     | 1.25 (0.93, 1.68) | 0.13     |
| Xanthosine        | 68.2 (47.4-106.2)      | 63.1 (40.7-88.8)    | 1.39 (1.00, 1.93) | 0.052    | 1.48 (1.02, 2.13) | 0.037*   |
| Summary score     | 55.5 (47.9-62.5)       | 51.9 (43.7-58.7)    | 1.43 (1.06, 1.92) | 0.019*   | 1.57 (1.13, 2.18) | 0.0076** |

<sup>a</sup>Cutoffs in ml/min are cinnamoylglycine >2000, isovalerylglycine >3000, p-cresol sulfate >500, xanthosine >450; no cutoff was defined for kynurenic acid.

Odds ratios are per 50% lower secretory clearance for individual solutes and per 10 point decrement for summary score. Model 1 adjusts for age, baseline eGFR, diabetes, flexibly modeled A1c, and sex; Model 2 further adjusts for log-transformed 24-hour urine albumin, SBP, BMI, and current smoking.

\*Significant at  $p < 0.05$

\*\*Significant at  $p < 0.01$  accounting for multiple comparisons

**Supplemental Table 2. Associations of secretory solute clearance with cystatin C-eGFR decline.**

|                   | Median (IQR) clearance (mL/min) |                     | Model 1           |          | Model 2           |          |
|-------------------|---------------------------------|---------------------|-------------------|----------|-------------------|----------|
|                   | Controls                        | Cases               | OR (95% CI)       | p-value  | OR (95% CI)       | p-value  |
| Cinnamoylglycine  | 151.8 (94.9-309.0)              | 170.7 (95.5-289.2)  | 0.90 (0.74, 1.11) | 0.32     | 0.88 (0.71, 1.09) | 0.24     |
| Isovalerylglycine | 715.8 (521.5-1221.0)            | 632.5 (445.0-997.3) | 1.69 (1.14, 2.52) | 0.0094** | 1.93 (1.25, 3.00) | 0.0031** |
| Kynurenic acid    | 403.4 (273.7-588.3)             | 324.3 (243.1-456.9) | 1.96 (1.20, 3.21) | 0.007**  | 2.33 (1.36, 3.98) | 0.0021** |
| P-cresol sulfate  | 34.9 (24.4-51.6)                | 30.7 (20.5-48.0)    | 1.14 (0.88, 1.48) | 0.32     | 1.22 (0.92, 1.63) | 0.17     |
| Xanthosine        | 68.2 (47.4-106.2)               | 63.1 (40.7-88.8)    | 1.45 (1.04, 2.02) | 0.028*   | 1.56 (1.08, 2.25) | 0.018*   |
| Summary score     | 50.8 (43.6-57.0)                | 47.2 (39.6-53.4)    | 1.45 (1.08, 1.94) | 0.014*   | 1.59 (1.15, 2.21) | 0.0055** |

Odds ratios are per 50% lower secretory clearance for individual solutes and per 10-point decrement for summary score. Model 1 adjusts for age, baseline eGFR (2012 CKD-EPI cystatin C), diabetes, flexibly modeled A1c, and sex; Model 2 further adjusts for log-transformed 24-hour urine albumin, SBP, BMI, and current smoking.

\*Significant at  $p < 0.05$

\*\*Significant at  $p < 0.01$  accounting for multiple comparisons

**Supplemental Table 3. Associations of secretory solute clearance with eGFR decline, including further adjustment Model 3 including smoking, RAAS inhibitors, diuretics, and HbA1c.**

|                   | Model 1           |             | Model 2           |          | Model 3           |          |
|-------------------|-------------------|-------------|-------------------|----------|-------------------|----------|
|                   | OR (95% CI)       | OR (95% CI) | OR (95% CI)       | p-value  | OR (95% CI)       | p-value  |
| Cinnamoylglycine  | 0.89 (0.72, 1.10) | 0.29        | 0.88 (0.71, 1.09) | 0.25     | 0.85 (0.67, 1.06) | 0.15     |
| Isovalerylglycine | 1.69 (1.14, 2.52) | 0.0091**    | 1.91 (1.23, 2.96) | 0.0038** | 1.96 (1.25, 3.07) | 0.0035** |
| Kynurenic acid    | 1.93 (1.18, 3.16) | 0.0086**    | 2.26 (1.33, 3.87) | 0.0028** | 2.42 (1.38, 4.26) | 0.0022** |
| P-cresol sulfate  | 1.12 (0.87, 1.45) | 0.38        | 1.22 (0.92, 1.62) | 0.16     | 1.24 (0.93, 1.65) | 0.15     |
| Xanthosine        | 1.39 (1.00, 1.93) | 0.052       | 1.48 (1.02, 2.13) | 0.037*   | 1.55 (1.06, 2.27) | 0.023*   |
| Summary score     | 1.43 (1.06, 1.92) | 0.019*      | 1.57 (1.13, 2.18) | 0.0076** | 1.6 (1.14, 2.24)  | 0.0063** |

Odds ratios are per 50% lower secretory clearance for individual solutes and per 10-point decrement for summary score. Model 1 adjusts for age, baseline eGFR (2012 CKD-EPI creatinine), diabetes, and sex; Model 2 further adjusts Model 1 for log-transformed 24-hour urine albumin, SBP, BMI, and current smoking; Model 3 further adjusts Model 2 for RAASi, diuretics, and HbA1c.

\*Significant at  $p < 0.05$

\*\*Significant at  $p < 0.01$  accounting for multiple comparisons

**Supplemental Table 4. Associations of secretory fractional excretion with eGFR decline.**

|                   | Median (IQR) FE |               | Model 1           |          | Model 2           |          |
|-------------------|-----------------|---------------|-------------------|----------|-------------------|----------|
|                   | Controls        | Cases         | OR (95% CI)       | p-value  | OR (95% CI)       | p-value  |
| Cinnamoylglycine  | 1.2 (0.8-2.3)   | 1.4 (0.9-2.4) | 0.90 (0.73, 1.11) | 0.32     | 0.87 (0.70, 1.08) | 0.21     |
| Isovalerylglycine | 6.6 (4.8-9.0)   | 5.6 (3.7-7.4) | 1.73 (1.16, 2.58) | 0.0073** | 1.84 (1.19, 2.85) | 0.0064** |
| Kynurenic acid    | 3.4 (2.6-4.3)   | 2.8 (2.2-3.5) | 2.21 (1.27, 3.82) | 0.0049** | 2.44 (1.33, 4.47) | 0.0041** |
| P-cresol sulfate  | 0.3 (0.2-0.4)   | 0.3 (0.2-0.4) | 1.14 (0.87, 1.49) | 0.33     | 1.20 (0.90, 1.60) | 0.21     |
| Xanthosine        | 0.6 (0.4-0.9)   | 0.5 (0.3-0.8) | 1.42 (1.01, 1.99) | 0.044*   | 1.45 (1.00, 2.11) | 0.053    |

Odds ratios are per 50% lower secretory clearance for individual solutes. Model 1 adjusts for age, baseline eGFR (2012 CKD-EPI creatinine), diabetes, flexibly modeled A1c, and sex; Model 2 further adjusts for log-transformed 24-hour urine albumin, SBP, BMI, and current smoking.

\*Significant at  $p < 0.05$

\*\*Significant at  $p < 0.01$  accounting for multiple comparisons

**Supplemental Table 5: Comparison of case-control population to all Jackson Heart Study participants that completed 24-hour urine collection**

|                                       | Case-control<br>(N = 254) | All 24-hour urine patients<br>(N = 1,027) |
|---------------------------------------|---------------------------|-------------------------------------------|
| Age*                                  | 60.4 (10.3)               | 58.9 (11.3)                               |
| Female*                               | 192 (75.5%)               | 698 (67.9%)                               |
| BMI<br>(kg/m <sup>2</sup> )           | 32.5 (6.4)                | 31.9 (6.9)                                |
| eGFR*<br>(ml/min/1.73m <sup>2</sup> ) | 93.9 (19.7)               | 84.8 (17.9)                               |
| Diabetes*                             | 79 (31%)                  | 253 (24.6%)                               |
| HbA1c                                 | 6.15 (1.32)               | 6.1 (1.24)                                |
| BP medications                        | 181 (71.3%)               | 614 (59.8%)                               |
| SBP (mmHg)                            | 128.5 (17.6)              | 127.7 (17.4)                              |
| DBP (mmHg)                            | 76.9 (10.2)               | 77.9 (10.2)                               |
| Urine albumin<br>(mg/24hr)**          | 7.9 (5.5-15.4)            | 7.6 (5.3-15.4)                            |

\* Matching variable. \*\* Albuminuria derived from 24-hour urine collection; presented as median (IQR)

Entries are mean (SD) for continuous variables or N (%) for categorical variables, except as noted.

Cases and controls were matched on age ( $\pm 7$  years), eGFR ( $\pm 10$  mL/min/1.73m<sup>2</sup>), and diabetes status; cases and controls were further matched on sex, when possible.
